# Supplementary material for: Bioinspired polarization vision enables underwater geolocalization
Source: PubMed Central journal article supplement — Sci Adv. 2018 Apr 4;4(4):eaao6841. doi: 10.1126/sciadv.aao6841 (PMC5938230; doi:10.1126/sciadv.aao6841), 2018-04-04
Supplement: aao6841_SM.pdf [file aao6841_SM.pdf]

## Supplementary Materials for **Bioinspired polarization vision enables underwater geolocalization**

Samuel B. Powell, Roman Garnett, Justin Marshall, Charbel Rizk, Viktor Gruev

Published 4 April 2018, *Sci. Adv.* **4**, eaao6841 (2018)  
DOI: 10.1126/sciadv.aao6841

### **The PDF file includes:**

- fig. S1. RMS error statistics.
- fig. S2. Sensitivity data recorded under windy conditions.
- fig. S3. Camera hardware in use.
- Legend for movie S1

**Other Supplementary Material for this manuscript includes the following:**  
(available at [advances.sciencemag.org/cgi/content/full/4/4/eaao6841/DC1](https://advances.sciencemag.org/cgi/content/full/4/4/eaao6841/DC1))

- movie S1 (.mp4 format). Data collection with bioinspired polarization imaging sensor.

## **Supplementary Materials**

**movie S1. Data collection with bioinspired polarization imaging sensor.**

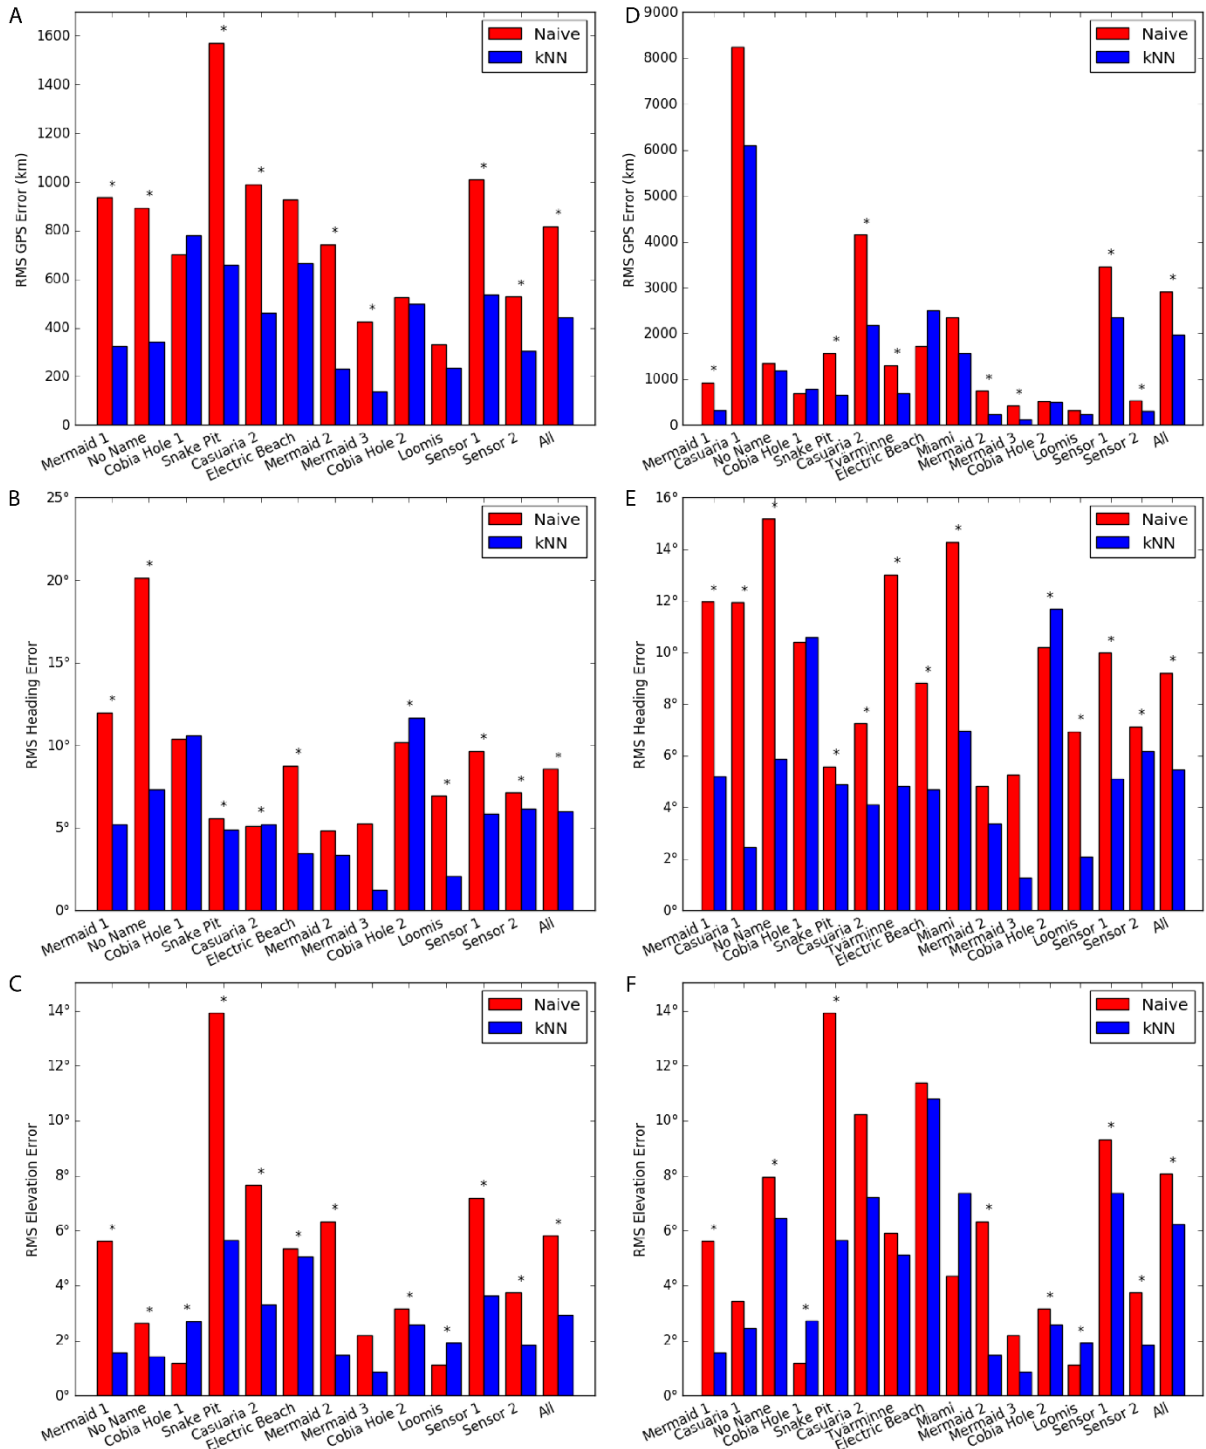

**fig. S1. RMS error statistics.** (A, B, C) RMS errors of position, sun heading, and sun elevation estimates, respectively, for sun elevations at least  $40^\circ$  above the horizon. (D, E, F) RMS errors of position, sun heading, and sun elevation estimates, respectively, for all sun elevations. \* indicates significant difference between the naive and *kNN* results,  $p < 0.05$ .

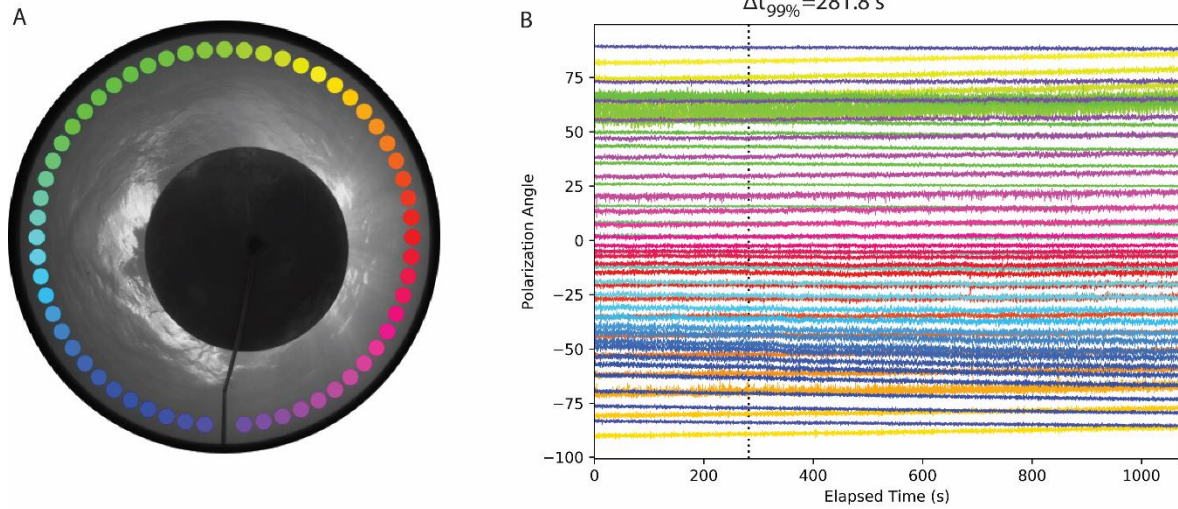

**fig. S2. Sensitivity data recorded under windy conditions.** (A) Intensity image taken during a sensitivity experiment performed during the morning. The camera is set vertically, with a disk to block the sun. The colored circles around the periphery show the regions over which the polarization angles are measured. Regions with partial polarization less than 5% were rejected. (B) Polarization angles measured during the sensitivity experiment; colors correspond to the regions shown in (A). The vertical dotted line shows how long it takes the angles to change with 99% confidence.

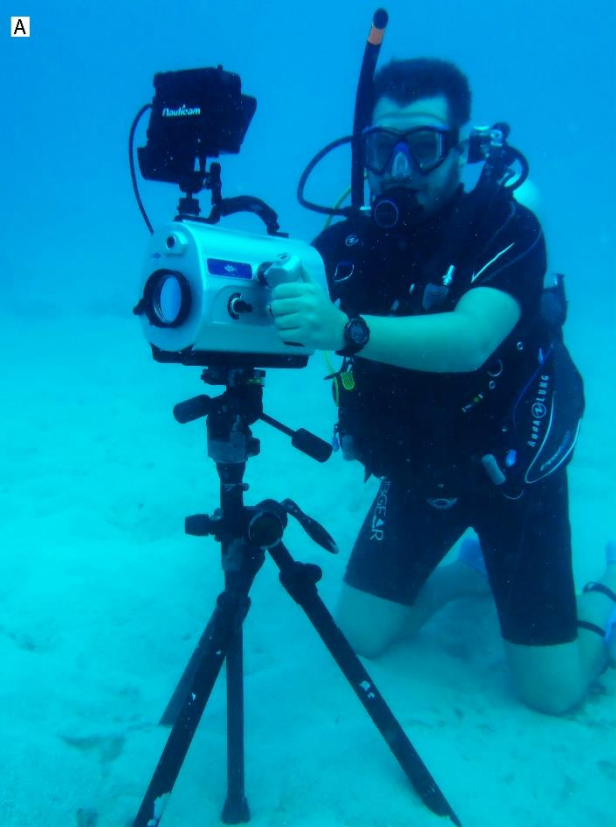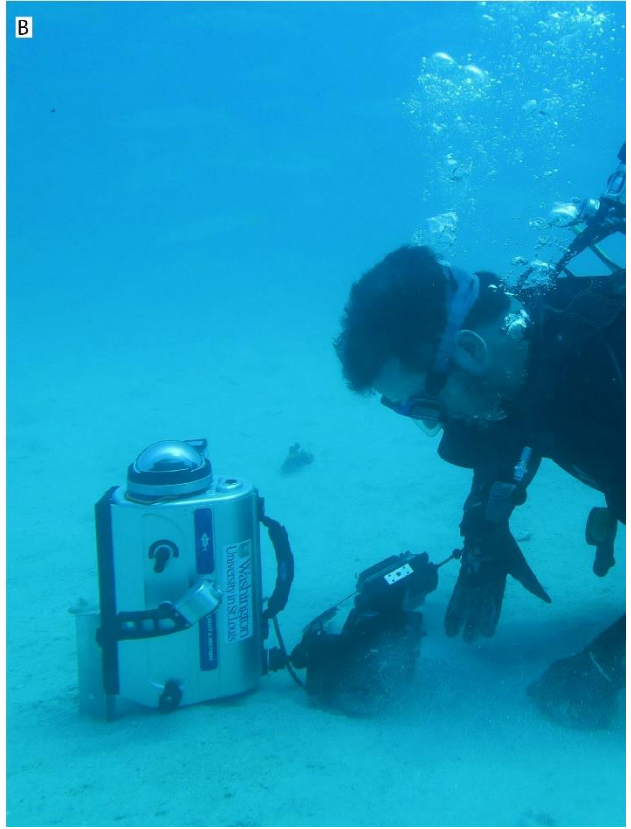

**fig. S3. Camera hardware in use. (A)** Underwater polarization camera prepared for recording sun inference data. **(B)** Underwater polarization camera with fish-eye lens, in a configuration similar to how the sensitivity data were collected.
